# Supplementary material for: Tendinosis develops from age‐ and oxygen tension‐dependent modulation of Rac1 activity
Source: PubMed Central journal article supplement (PMC6516173; doi:10.1111/acel.12934), 2019-04-02
Supplement: ACEL-18-e12934-s001.pdf [file ACEL-18-e12934-s001.pdf]

| Gender | Age | Group           | Mechanism of injury              |
|--------|-----|-----------------|----------------------------------|
| M      | 25  | Young           | Sharp amputation; circular saw   |
| M      | 35  | Young           | Sharp amputation; table saw      |
| M      | 42  | Young           | Sharp amputation; straight blade |
| M      | 31  | Young           | Sharp amputation; table saw      |
| F      | 30  | Young           | Sharp amputation; industrial     |
| F      | 19  | Young           | Sharp amputation; industrial     |
| F      | 35  | Tendinotic      | Repetitive use; delayed tendon   |
| M      | 44  | Tendinotic      | Repetitive use; delayed tendon   |
| F      | 42  | Tendinotic      | Repetitive use; delayed tendon   |
| M      | 35  | Tendinotic      | Repetitive use; delayed tendon   |
| F      | 81  | Aged            | Sharp amputation; vehicle edge   |
| F      | 82  | Aged            | Sharp amputation; straight blade |
| M      | 75  | Aged            | Sharp amputation; straight blade |
| M      | 65  | Aged            | Sharp amputation; industrial     |
| F      | 73  | Aged tendinotic | Tendinopathy; pulley release     |
| F      | 84  | Aged tendinotic | Tendinopathy; pulley release     |
| M      | 87  | Aged tendinotic | Tendinopathy; pulley release     |
| M      | 75  | Aged tendinotic | Tendinopathy; pulley release     |
