# Supplementary material for: Tendinosis develops from age‐ and oxygen tension‐dependent modulation of Rac1 activity
Source: PubMed Central journal article supplement (PMC6516173; doi:10.1111/acel.12934), 2019-04-02
Supplement: ACEL-18-e12934-s002.pdf [file ACEL-18-e12934-s002.pdf]

| AGED |       |       |       |       |       |       |  |
|------|-------|-------|-------|-------|-------|-------|--|
|      | C1    | C2    | C3    | CX    | Tm    | ScI   |  |
| C1   | 1.00  | 0.31  | 0.79  | -0.13 | 0.57  | -0.03 |  |
| C2   | 0.31  | 1.00  | 0.14  | 0.68  | 0.45  | -0.20 |  |
| C3   | 0.79  | 0.14  | 1.00  | -0.25 | 0.81  | -0.18 |  |
| CX   | -0.13 | 0.68  | -0.25 | 1.00  | 0.16  | -0.01 |  |
| Tm   | 0.57  | 0.45  | 0.81  | 0.16  | 1.00  | -0.45 |  |
| ScI  | -0.03 | -0.20 | -0.18 | -0.01 | -0.45 | 1.00  |  |

## Supplementary Data 2

| : Tendinotic |       |       |       |       |       |       |  |
|--------------|-------|-------|-------|-------|-------|-------|--|
| : 5k         |       |       |       |       |       |       |  |
|              | C1    | C2    | C3    | CX    | Tm    | Scl   |  |
| C1           | 1.00  | -0.05 | 0.53  | -0.01 | -0.05 | -0.04 |  |
| C2           | -0.05 | 1.00  | -0.17 | 0.78  | 0.74  | 0.02  |  |
| C3           | 0.53  | -0.17 | 1.00  | -0.45 | -0.33 | -0.48 |  |
| CX           | -0.01 | 0.78  | -0.45 | 1.00  | 0.55  | 0.29  |  |
| Tm           | -0.05 | 0.74  | -0.33 | 0.55  | 1.00  | 0.02  |  |
| Scl          | -0.04 | 0.02  | -0.48 | 0.29  | 0.02  | 1.00  |  |

| : Tendinotic |       |       |       |       |       |       |  |
|--------------|-------|-------|-------|-------|-------|-------|--|
| : 25k        |       |       |       |       |       |       |  |
|              | C1    | C2    | C3    | CX    | Tm    | Scl   |  |
| C1           | 1.00  | -0.04 | 0.40  | -0.29 | -0.33 | -0.33 |  |
| C2           | -0.04 | 1.00  | -0.26 | 0.80  | 0.80  | -0.42 |  |
| C3           | 0.40  | -0.26 | 1.00  | -0.29 | -0.43 | -0.07 |  |
| CX           | -0.29 | 0.80  | -0.29 | 1.00  | 0.83  | -0.12 |  |
| Tm           | -0.33 | 0.80  | -0.43 | 0.83  | 1.00  | -0.10 |  |
| Scl          | -0.33 | -0.42 | -0.07 | -0.12 | -0.10 | 1.00  |  |

| : Tendinotic |       |       |       |       |       |       |  |
|--------------|-------|-------|-------|-------|-------|-------|--|
| : 50k        |       |       |       |       |       |       |  |
|              | C1    | C2    | C3    | CX    | Tm    | Scl   |  |
| C1           | 1.00  | -0.11 | 0.25  | 0.07  | -0.03 | -0.09 |  |
| C2           | -0.11 | 1.00  | -0.41 | 0.91  | 0.93  | 0.47  |  |
| C3           | 0.25  | -0.41 | 1.00  | -0.34 | -0.40 | -0.59 |  |
| CX           | 0.07  | 0.91  | -0.34 | 1.00  | 0.92  | 0.56  |  |
| Tm           | -0.03 | 0.93  | -0.40 | 0.92  | 1.00  | 0.58  |  |
| Scl          | -0.09 | 0.47  | -0.59 | 0.56  | 0.58  | 1.00  |  |

## Supplementary Data 2

| : Young |       |      |       |       |      |       |  |
|---------|-------|------|-------|-------|------|-------|--|
| : 5k    |       |      |       |       |      |       |  |
|         | C1    | C2   | C3    | CX    | Tm   | Scl   |  |
| C1      | 1.00  | 0.47 | 0.51  | -0.06 | 0.25 | 0.00  |  |
| C2      | 0.47  | 1.00 | 0.35  | 0.46  | 0.68 | 0.24  |  |
| C3      | 0.51  | 0.35 | 1.00  | 0.18  | 0.41 | -0.11 |  |
| CX      | -0.06 | 0.46 | 0.18  | 1.00  | 0.57 | 0.76  |  |
| Tm      | 0.25  | 0.68 | 0.41  | 0.57  | 1.00 | 0.43  |  |
| Scl     | 0.00  | 0.24 | -0.11 | 0.76  | 0.43 | 1.00  |  |

| : Young |       |      |       |       |      |       |  |
|---------|-------|------|-------|-------|------|-------|--|
| : 25k   |       |      |       |       |      |       |  |
|         | C1    | C2   | C3    | CX    | Tm   | Scl   |  |
| C1      | 1.00  | 0.30 | 0.74  | -0.31 | 0.07 | -0.18 |  |
| C2      | 0.30  | 1.00 | 0.57  | 0.45  | 0.51 | 0.21  |  |
| C3      | 0.74  | 0.57 | 1.00  | -0.02 | 0.29 | 0.06  |  |
| CX      | -0.31 | 0.45 | -0.02 | 1.00  | 0.41 | 0.56  |  |
| Tm      | 0.07  | 0.51 | 0.29  | 0.41  | 1.00 | 0.55  |  |
| Scl     | -0.18 | 0.21 | 0.06  | 0.56  | 0.55 | 1.00  |  |

| : Young |       |      |       |       |      |       |  |
|---------|-------|------|-------|-------|------|-------|--|
| : 50k   |       |      |       |       |      |       |  |
|         | C1    | C2   | C3    | CX    | Tm   | Scl   |  |
| C1      | 1.00  | 0.10 | 0.68  | 0.02  | 0.04 | -0.04 |  |
| C2      | 0.10  | 1.00 | 0.19  | 0.40  | 0.81 | 0.39  |  |
| C3      | 0.68  | 0.19 | 1.00  | -0.34 | 0.02 | -0.04 |  |
| CX      | 0.02  | 0.40 | -0.34 | 1.00  | 0.39 | 0.06  |  |
| Tm      | 0.04  | 0.81 | 0.02  | 0.39  | 1.00 | 0.73  |  |
| Scl     | -0.04 | 0.39 | -0.04 | 0.06  | 0.73 | 1.00  |  |

## Supplementary Data 2
