# Supplementary material for: Tendinosis develops from age‐ and oxygen tension‐dependent modulation of Rac1 activity
Source: PubMed Central journal article supplement (PMC6516173; doi:10.1111/acel.12934), 2019-04-02
Supplement: ACEL-18-e12934-s003.pdf [file ACEL-18-e12934-s003.pdf]

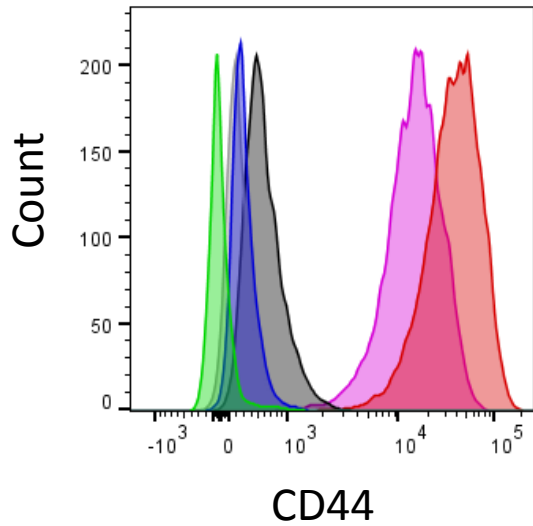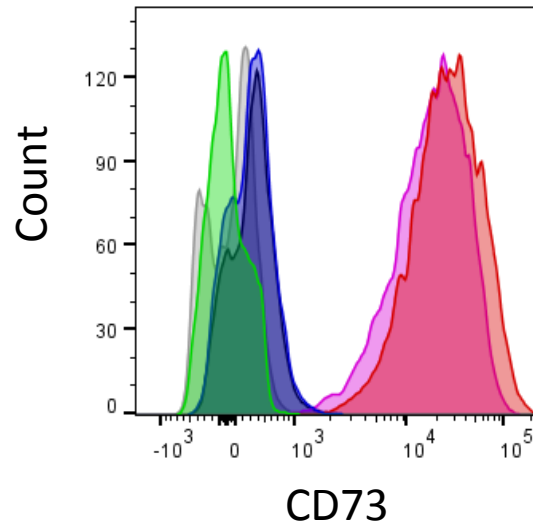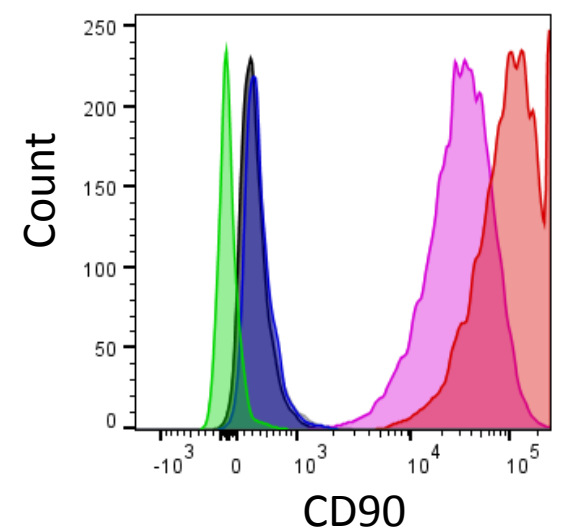

Aged cells

Young cells

Aged isotype control

Young isotype control

Aged unstained cells

Young unstained cells

**Supplementary Data 2a**

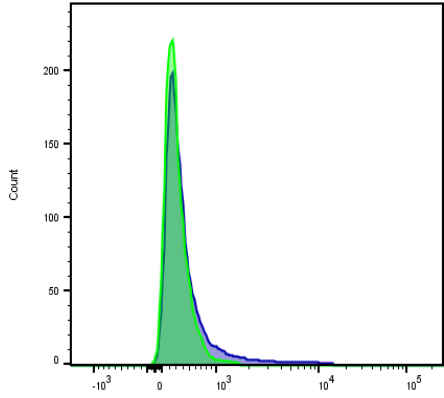

CD19

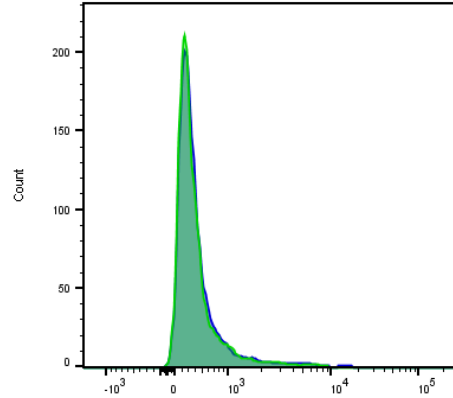

CD34

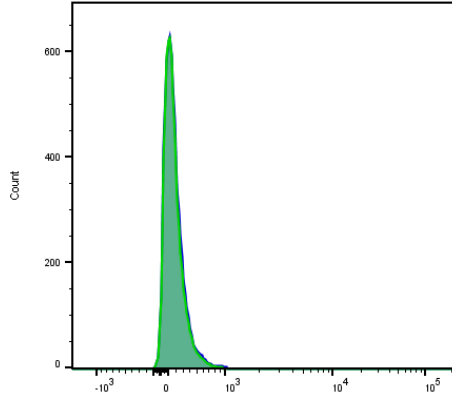

CD45

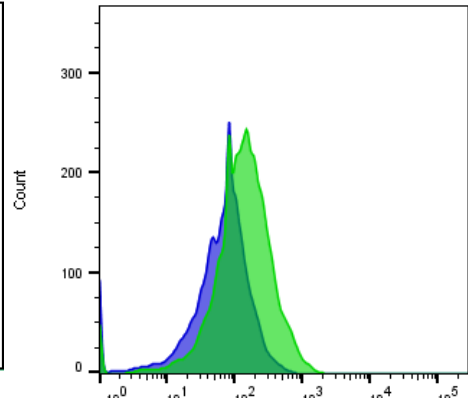

CD105

Aged cells

Young cells

**Supplementary Data 2a**
