# Supplementary material for: Tendinosis develops from age‐ and oxygen tension‐dependent modulation of Rac1 activity
Source: PubMed Central journal article supplement (PMC6516173; doi:10.1111/acel.12934), 2019-04-02
Supplement: ACEL-18-e12934-s005.pdf [file ACEL-18-e12934-s005.pdf]

|            |     | C1    | C2    | C3    | CX    | Tm    | Rac   | Rho   |  |
|------------|-----|-------|-------|-------|-------|-------|-------|-------|--|
| AGED       | C1  | 1.00  | 0.31  | 0.79  | -0.13 | 0.57  | -0.40 | -0.20 |  |
|            | C2  | 0.31  | 1.00  | 0.14  | 0.68  | 0.45  | 0.60  | -0.80 |  |
|            | C3  | 0.79  | 0.14  | 1.00  | -0.25 | 0.81  | -0.80 | 0.40  |  |
|            | CX  | -0.13 | 0.68  | -0.25 | 1.00  | 0.16  | 0.40  | 0.00  |  |
|            | Tm  | 0.57  | 0.45  | 0.81  | 0.16  | 1.00  | -0.40 | 0.20  |  |
|            | Rac | -0.40 | 0.60  | -0.80 | 0.40  | -0.40 | 1.00  | -0.80 |  |
|            | Rho | -0.20 | -0.80 | 0.40  | 0.00  | 0.20  | -0.80 | 1.00  |  |
| TENDINOTIC | C1  | 1.00  | -0.11 | 0.42  | -0.09 | -0.20 | -0.30 | 0.19  |  |
|            | C2  | -0.11 | 1.00  | -0.28 | 0.84  | 0.90  | 0.13  | 0.14  |  |
|            | C3  | 0.42  | -0.28 | 1.00  | -0.37 | -0.36 | -0.16 | -0.11 |  |
|            | CX  | -0.09 | 0.84  | -0.37 | 1.00  | 0.81  | 0.04  | 0.21  |  |
|            | Tm  | -0.20 | 0.90  | -0.36 | 0.81  | 1.00  | 0.15  | 0.15  |  |
|            | Rac | -0.30 | 0.13  | -0.16 | 0.04  | 0.15  | 1.00  | -0.03 |  |
|            | Rho | 0.19  | 0.14  | -0.11 | 0.21  | 0.15  | -0.03 | 1.00  |  |
| YOUNG      | C1  | 1.00  | 0.32  | 0.62  | -0.09 | 0.12  | 0.28  | 0.12  |  |
|            | C2  | 0.32  | 1.00  | 0.39  | 0.45  | 0.68  | 0.29  | -0.04 |  |
|            | C3  | 0.62  | 0.39  | 1.00  | -0.08 | 0.26  | 0.41  | -0.21 |  |
|            | CX  | -0.09 | 0.45  | -0.08 | 1.00  | 0.46  | 0.04  | -0.01 |  |
|            | Tm  | 0.12  | 0.68  | 0.26  | 0.46  | 1.00  | 0.24  | 0.21  |  |
|            | Rac | 0.28  | 0.29  | 0.41  | 0.04  | 0.24  | 1.00  | -0.02 |  |
|            | Rho | 0.12  | -0.04 | -0.21 | -0.01 | 0.21  | -0.02 | 1.00  |  |

## Supplementary Data 3
