# Supplementary material for: Tendinosis develops from age‐ and oxygen tension‐dependent modulation of Rac1 activity
Source: PubMed Central journal article supplement (PMC6516173; doi:10.1111/acel.12934), 2019-04-02
Supplement: ACEL-18-e12934-s007.pdf [file ACEL-18-e12934-s007.pdf]

| : 5k    |       |      |       |       |      |      |       |
|---------|-------|------|-------|-------|------|------|-------|
| : Young |       |      |       |       |      |      |       |
|         | C1    | C2   | C3    | CX    | Tm   | Rac  | Rho   |
| C1      | 1.00  | 0.47 | 0.51  | -0.06 | 0.25 | 0.28 | -0.03 |
| C2      | 0.47  | 1.00 | 0.35  | 0.46  | 0.68 | 0.65 | 0.08  |
| C3      | 0.51  | 0.35 | 1.00  | 0.18  | 0.41 | 0.42 | -0.16 |
| CX      | -0.06 | 0.46 | 0.18  | 1.00  | 0.57 | 0.32 | -0.14 |
| Tm      | 0.25  | 0.68 | 0.41  | 0.57  | 1.00 | 0.33 | 0.15  |
| Rac     | 0.28  | 0.65 | 0.42  | 0.32  | 0.33 | 1.00 | 0.18  |
| Rho     | -0.03 | 0.08 | -0.16 | -0.14 | 0.15 | 0.18 | 1.00  |

| DENSITY |       |       |       |       |       |  |
|---------|-------|-------|-------|-------|-------|--|
| 5k      |       |       |       |       |       |  |
|         | C3    | CX    | Tm    | Rac   | Rho   |  |
| C3      | 1.00  | 0.03  | 0.13  | 0.22  | 0.10  |  |
| CX      | 0.03  | 1.00  | 0.40  | 0.23  | 0.30  |  |
| Tm      | 0.13  | 0.40  | 1.00  | 0.05  | 0.22  |  |
| Rac     | 0.22  | 0.23  | 0.05  | 1.00  | -0.10 |  |
| Rho     | 0.10  | 0.30  | 0.22  | -0.10 | 1.00  |  |
| 25 k    |       |       |       |       |       |  |
|         | C3    | CX    | Tm    | Rac   | Rho   |  |
| C3      | 1.00  | 0.14  | 0.03  | 0.41  | 0.20  |  |
| CX      | 0.14  | 1.00  | 0.57  | 0.41  | 0.34  |  |
| Tm      | 0.03  | 0.57  | 1.00  | 0.33  | 0.09  |  |
| Rac     | 0.41  | 0.41  | 0.33  | 1.00  | 0.45  |  |
| Rho     | 0.20  | 0.34  | 0.09  | 0.45  | 1.00  |  |
| 50 k    |       |       |       |       |       |  |
|         | C3    | CX    | Tm    | Rac   | Rho   |  |
| C3      | 1.00  | 0.04  | -0.09 | -0.20 | 0.20  |  |
| CX      | 0.04  | 1.00  | 0.61  | -0.20 | 0.55  |  |
| Tm      | -0.09 | 0.61  | 1.00  | 0.28  | 0.21  |  |
| Rac     | -0.20 | -0.20 | 0.28  | 1.00  | -0.18 |  |
| Rho     | 0.20  | 0.55  | 0.21  | -0.18 | 1.00  |  |

## Supplementary Data 4
