# Supplementary material for: Tendinosis develops from age‐ and oxygen tension‐dependent modulation of Rac1 activity
Source: PubMed Central journal article supplement (PMC6516173; doi:10.1111/acel.12934), 2019-04-02

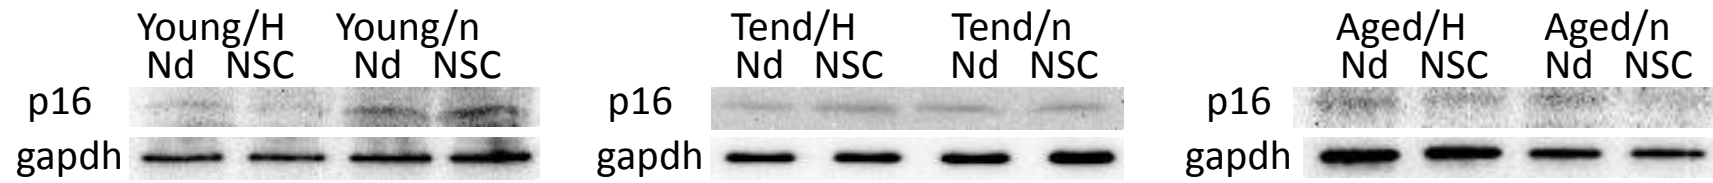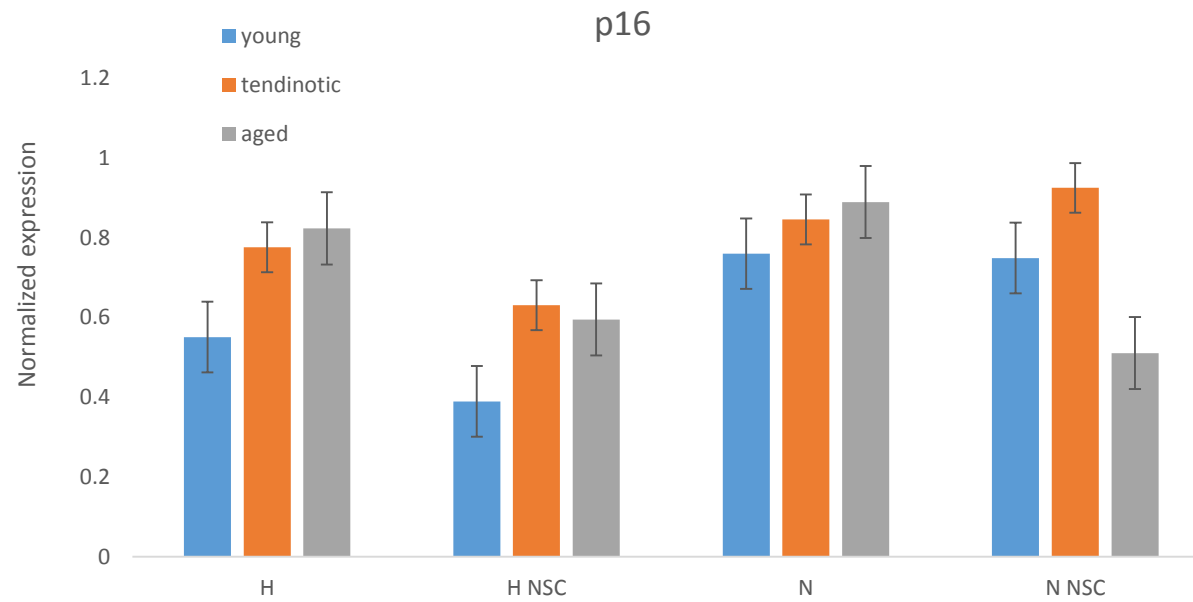

Supplement: ACEL-18-e12934-s008.pdf [file ACEL-18-e12934-s008.pdf]
